# Supplementary material for: Hindering the unlimited proliferation of tumor cells synergizes with destroying tumor blood vessels for effective cancer treatment
Source: Royal Society of Chemistry journal article supplement (doi:10.1039/d3bm01858j), 2024-01-01
Supplement: d3bm01858j1.pdf [file d3bm01858j1.pdf]

## **Supporting Information**

Hindering the unlimited proliferation of tumor cells synergizes with destroying tumor blood vessels for effective cancer treatment

**Ya Liu, Yajun Xu\*, Ying Wang, Jianlin Lv, Kun Wang, Zhaohui Tang\***

**\* Corresponding author.**

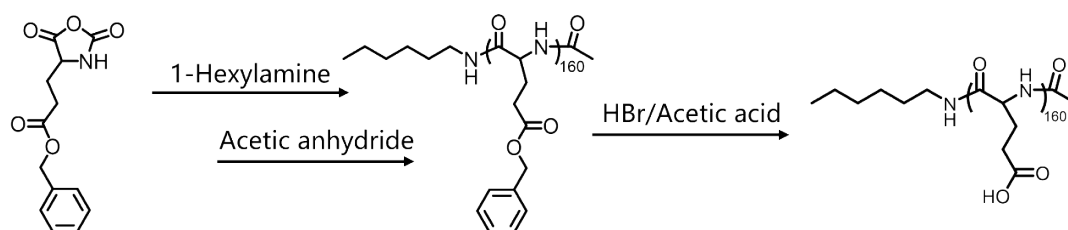

**Figure S1.** Synthesis route of poly(L-glutamic acid) (PLG).

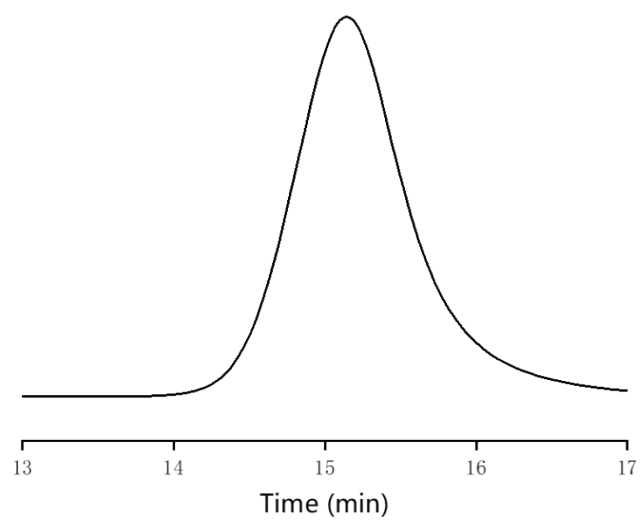

**Figure S2.** The GPC chromatogram of PLG.

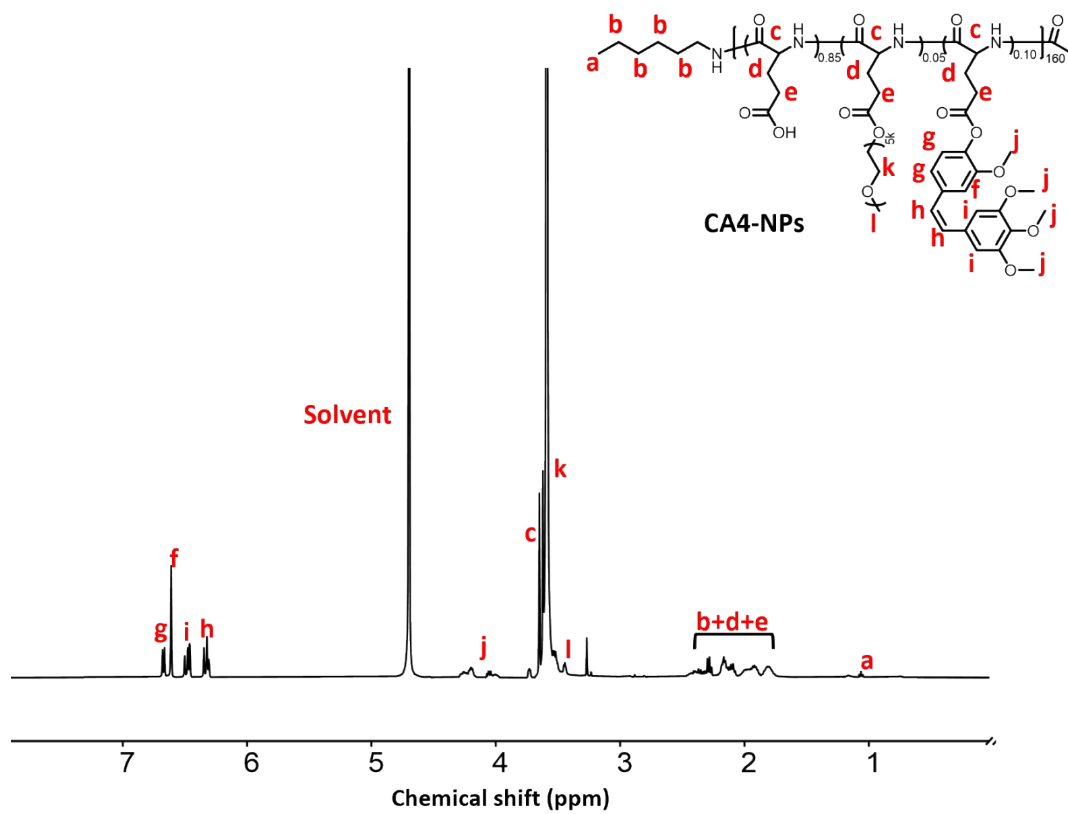

**Figure S3.**  $^1\text{H}$  NMR spectrum of CA4-NPs in  $\text{D}_2\text{O}/\text{NaOD}$ .

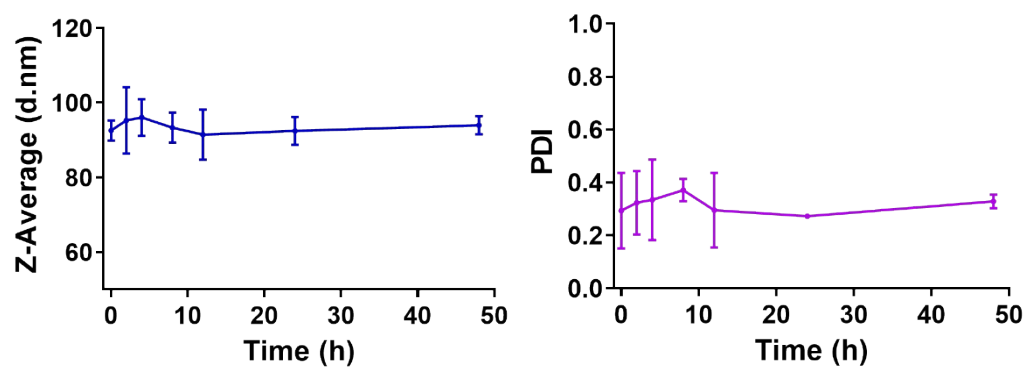

**Figure S4.** The stability of SN38-NPs in PBS (1X) measured by DLS ( $n = 3$ ); and performed as mean  $\pm$  standard deviation (SD).

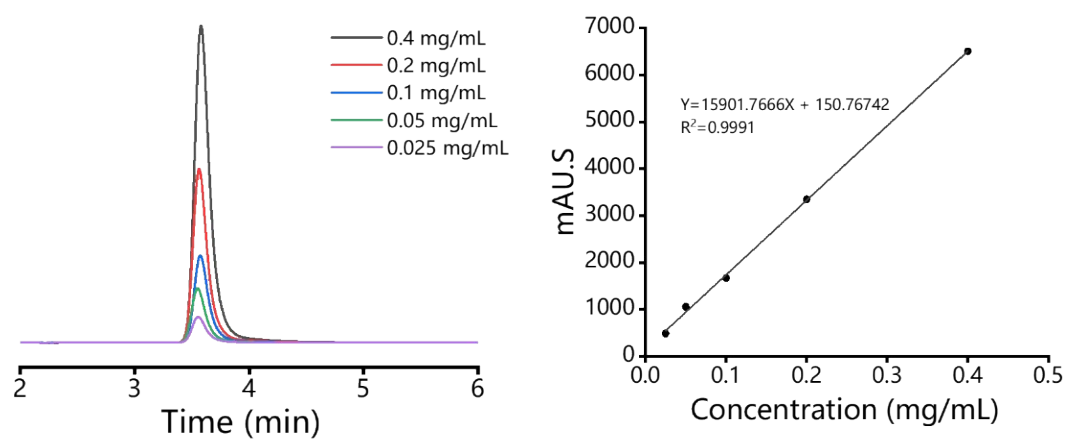

**Figure S5.** HPLC results and standard curve of SN38.

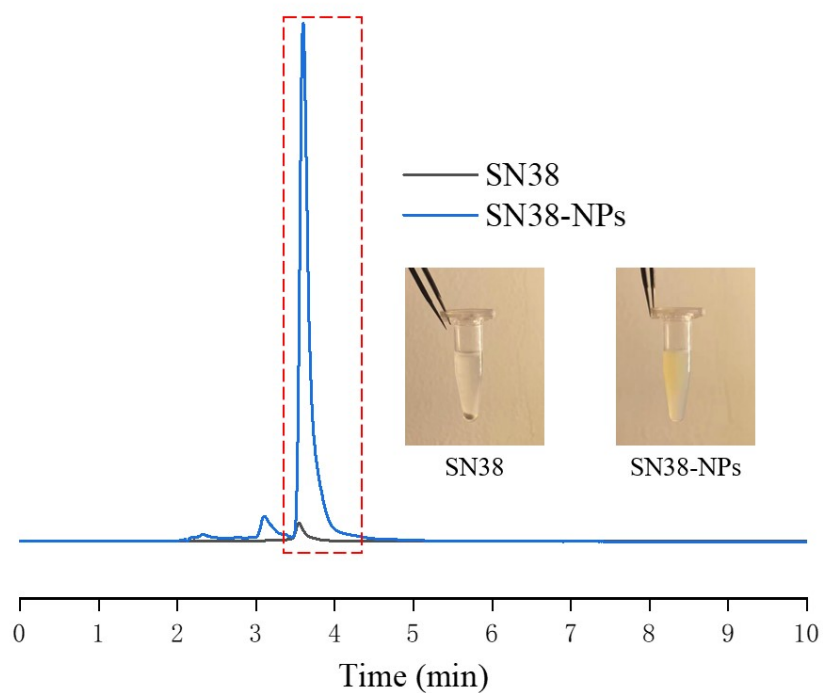

**Figure S6.** Solubility test of SN38-NPs and SN38: HPLC results showed the content of SN38 in the supernatant after centrifugation. The photos were taken after centrifugation. After centrifugation, the supernatant of SN38 was basically transparent with a large amount of precipitation, while there was no obvious precipitation in SN38-NPs solution.

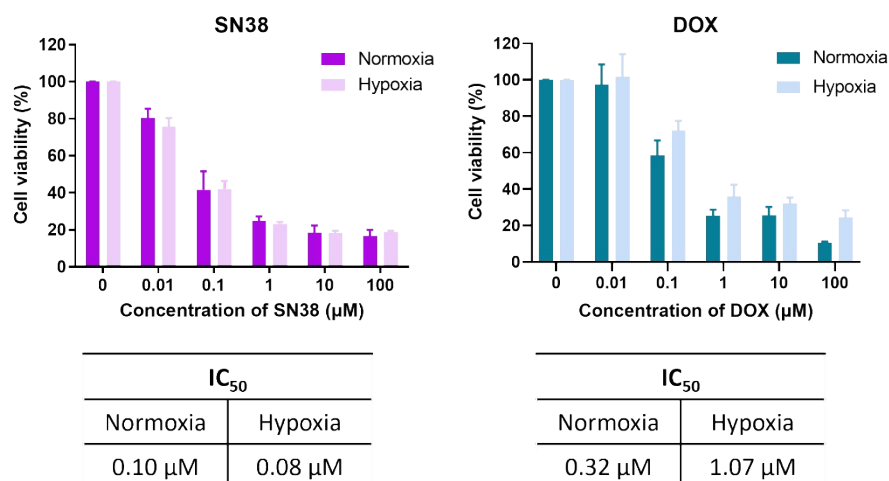

**Figure S7.** 4T1 cells were treated with different concentration of SN38 and Doxorubicin (DOX) for 48 h, and CCK-8 assay was performed (n = 4). Results were performed as mean ± standard error of the mean (SEM).

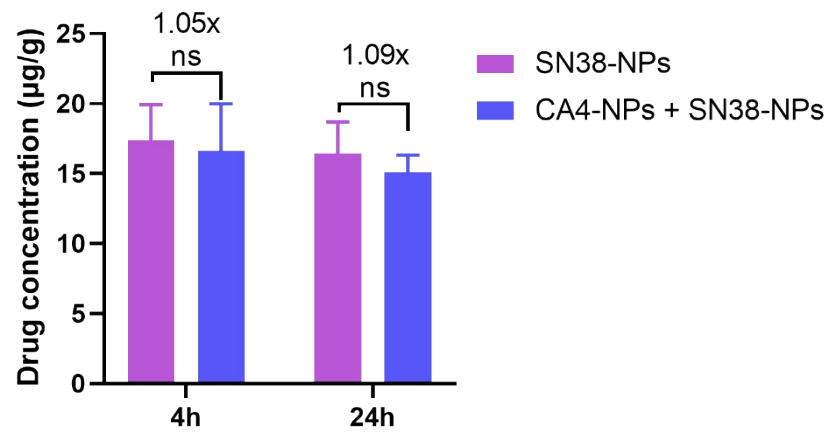

**Figure S8.** Biodistribution of total SN38 in tumors of mice after treated with SN38-NPs or CA4-NPs + SN38-NPs at different time intervals ( $n = 3$ ); performed as mean  $\pm$  standard deviation (SD).
